# Supplementary material for: Isolation of C. difficile Carriers Alone and as Part of a Bundle Approach for the Prevention of Clostridium difficile Infection (CDI): A Mathematical Model Based on Clinical Study Data
Source: PubMed Central journal article supplement (PMC4892551; doi:10.1371/journal.pone.0156577), 2016-06-03
Supplement: pone.0156577.s001.pdf [file pone.0156577.s001.pdf]

## **Supplementary Appendix**

Supplement to: Isolation of *C. difficile* carriers alone and as part of a bundle approach for the prevention of *Clostridium difficile* Infection (CDI): A Mathematical Model Based on Clinical Study Data

Ioannis M. Zacharioudakis, M.D., Fainareti N. Zervou, M.D., Christos A. Grigoras, M.Sc., Constantinos

I. Siettos, Ph.D., Eleftherios Mylonakis, M.D, Ph.D.

## Table of Contents

|                        |          |
|------------------------|----------|
| <b>Figure S1.....</b>  | <b>3</b> |
| <b>References.....</b> | <b>4</b> |

**Figure S1. Forest Plot of Prevalence of *C. difficile* Infections Originating from Patients Colonized with *C. difficile* on Hospital Admission.**

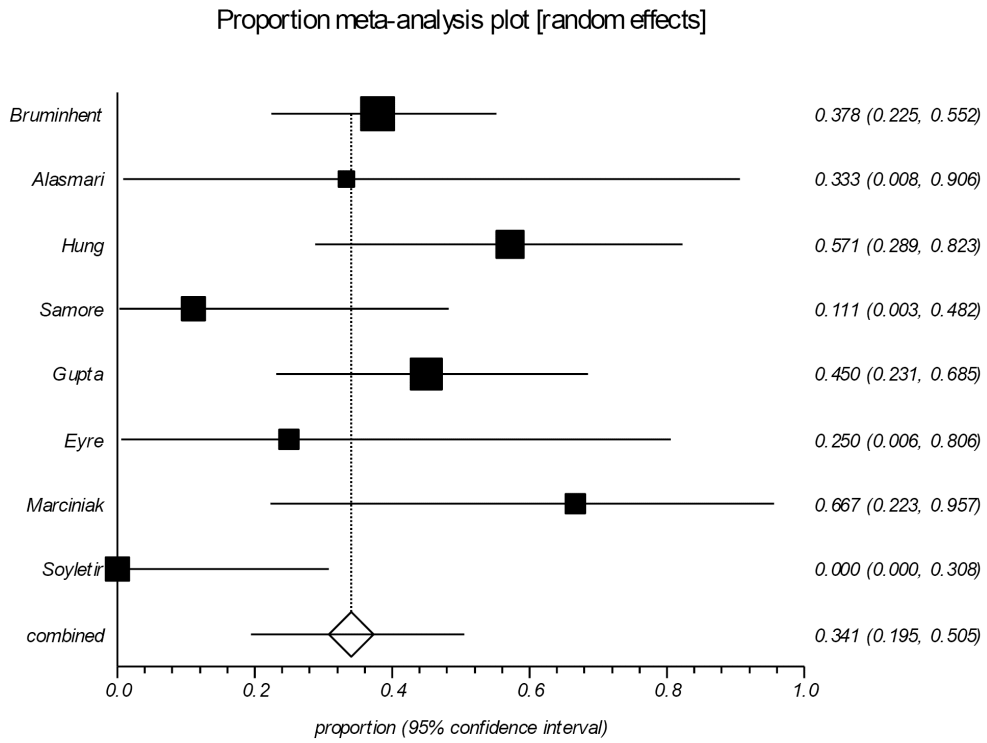

## **References of Studies Included in the Random-Effects Meta-Analysis of Prevalence of *C. difficile* Infections Originating from Patients Colonized with *C. difficile* on Hospital Admission.**

1. Bruminhent J, Wang ZX, Hu C, et al. Clostridium difficile colonization and disease in patients undergoing hematopoietic stem cell transplantation. Biol Blood Marrow Transplant **2014**; 20(9): 1329-1334.
2. Alasmari F, Seiler SM, Hink T, Burnham CA, Dubberke ER. Prevalence and risk factors for asymptomatic Clostridium difficile carriage. Clin Infect Dis **2014**; 59(2): 216-222.
3. Hung YP, Tsai PJ, Hung KH, et al. Impact of toxigenic Clostridium difficile colonization and infection among hospitalized adults at a district hospital in southern Taiwan. PLoS One **2012**; 7(8): e42415.
4. Samore MH, DeGirolami PC, Tlucko A, Lichtenberg DA, Melvin ZA, Karchmer AW. Clostridium difficile colonization and diarrhea at a tertiary care hospital. Clin Infect Dis **1994**; 18(2): 181-187.
5. Gupta S, Mehta V, Herring T, et al. A Large Prospective North American Epidemiologic Study of Hospital-Associated Clostridium difficile Colonization & Infection. In: International Clostridium difficile Symposium, Bled, Slovenia, 22 September 2012. Abstract O20.
6. Eyre DW, Griffiths D, Vaughan A, et al. Asymptomatic Clostridium difficile colonisation and onward transmission. PLoS One **2013**; 8(11): e78445.
7. Marciniak C, Chen D, Stein AC, Semik PE. Prevalence of Clostridium difficile colonization at admission to rehabilitation. Arch Phys Med Rehabil **2006**; 87(8): 1086-1090.
8. Soyletir G, Eskitürk A, Kilic G, Korten V, Tozun N. Clostridium difficile acquisition rate and its role in nosocomial diarrhoea at a university hospital in Turkey. Eur J Epidemiol **1996**; 12(4): 391-394.
